# Supplementary material for: Working with the “Enemy”: Supervised Space, Free Space, and Cross-Border Collaboration amid Geopolitical Rivalry
Source: Atypon-hosted journal article supplement (doi:10.1287/orsc.2021.15574), 2025-02-27
Supplement: orsc.2021.15574.sm1.pdf [file orsc.2021.15574.sm1.pdf]

Online Appendix

Appendix Item A1. Overall Schedule of Joint Activities from the 'Schedule Plan' Document, July 15, 1972. From NASA Archives [Box 5/3/4-12]

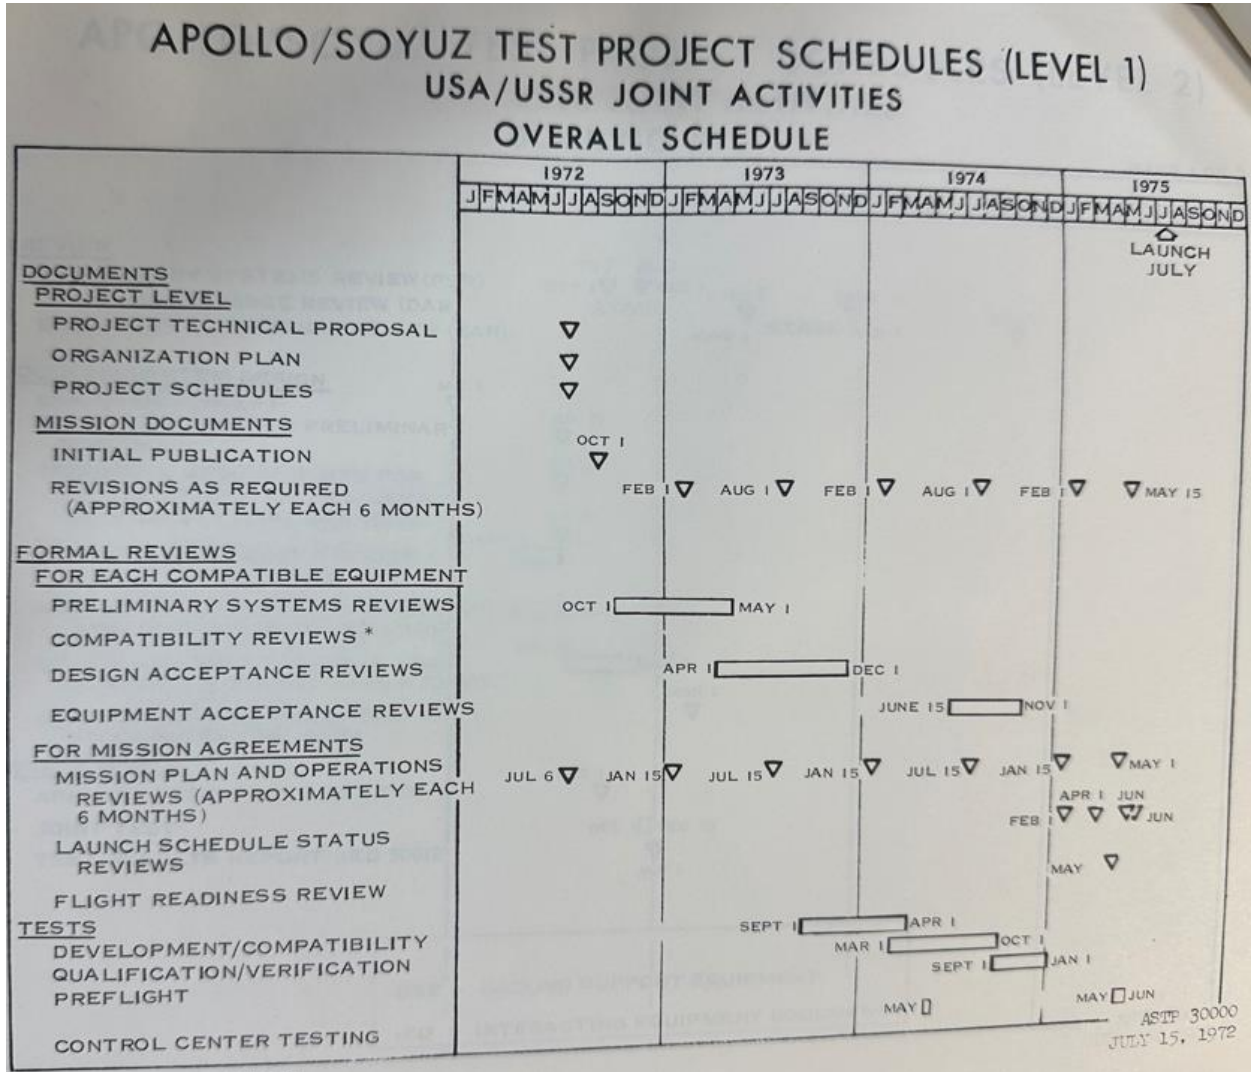

Appendix Item A2. Working group schedule as agreed upon in the Organizational Plan. July 10, 1972. Revised February 4, 1974. From NASA Archives [Box 5/3/4-12]

| WORKING GROUP SCHEDULE                        |                |   |   |                   |   |   |          |
|-----------------------------------------------|----------------|---|---|-------------------|---|---|----------|
| DATE                                          | WORKING GROUPS |   |   |                   |   |   | LOCATION |
|                                               | 0              | 1 | 2 | 3                 | 4 | 5 |          |
| ✓ JULY 6, 1972                                | X              | X | X | X                 | X | X | USA      |
| ✓ OCTOBER 9, 1972                             |                | X |   |                   |   | X | USSR     |
| ✓ NOVEMBER 24, 1972                           |                |   | X |                   | X |   | USA      |
| ✓ DECEMBER 4, 1972                            |                |   |   | X                 |   |   | USSR     |
| ✓ MARCH 15, 1973                              | X              | X | X | X                 | X | X | USA      |
| ✓ JUNE 1973                                   |                |   | X | X                 | X |   | USSR     |
| ✓ JULY 1973                                   | X              | X |   | +USSR FLIGHT CREW |   |   | USA      |
| ✓ SEPTEMBER 1973                              |                |   |   |                   | X |   | USSR     |
| ✓ OCTOBER 1973                                | X              | X |   | X                 | X | X | USSR     |
| ✓ NOVEMBER 1973                               | US FLIGHT CREW |   |   |                   |   |   | USSR     |
| JANUARY 1974                                  |                | X |   |                   | X | X | USA      |
| APRIL 1974 *                                  | X              | X | X | X                 | X | X | USA      |
| JUNE 1974                                     | X              | X | X | X                 | X | X | USSR     |
| JULY 1974                                     |                | X |   | US FLIGHT CREW    |   |   | USSR     |
| SEPTEMBER 1974                                |                | X |   | USSR FLIGHT CREW  |   |   | USA      |
| OCTOBER 1974                                  | X              | X | X | X                 | X | X | USA      |
| + INDIVIDUALS INVOLVED WITH EXPERIMENTS ONLY. |                |   |   |                   |   |   |          |
| * INCLUDING USSR FLIGHT CREW                  |                |   |   |                   |   |   |          |

NASA HQ MA73-6492  
REV 2-4-74
